# Supplementary material
Source: PubMed Central journal article supplement (PMC10105904)
Supplement: jama-e234314-s004.pdf [file jama-e234314-s004.pdf]

## Data Sharing Statement

Louie. VE303, a Defined Bacterial Consortium, vs Placebo for the Prevention of Recurrent *Clostridioides difficile* Infection. *JAMA*. Published April 15, 2023. doi:10.1001/jama.2023.4314

### Data

**Data available:** Yes

**Data types:** Deidentified participant data

**How to access data:** Any additional information required to reanalyze the data reported in this paper is available upon request by email: [info@vedantabio.com](mailto:info@vedantabio.com).

**When available:** With publication

### Supporting Documents

**Document types:** Statistical/analytic code

**How to access documents:** With publication

**When available:** With publication

### Additional Information

**Who can access the data:** Any additional information required to reanalyze the data reported in this paper is available upon request by email: [info@vedantabio.com](mailto:info@vedantabio.com).

**Types of analyses:** For a specified purpose

**Mechanisms of data availability:** NA
